*Manuscript currently in review at Frontiers in Ecology and Evolution (Updated June 2020)*  
**Urban Ecology Section – Behavioral adaptations to life in the city**

1 **Vigilance response of a key prey species to anthropogenic and naturogenic threats in**

2 **Detroit**

3

4 Samantha Lima<sup>1</sup>, Siria Gámez<sup>1</sup>, Nathaniel Arringdale<sup>1</sup>, and Nyeema C. Harris<sup>1\*†</sup>

5

6 <sup>1</sup>Applied Wildlife Ecology Lab, Ecology and Evolutionary Biology Department, University of

7 Michigan, Ann Arbor MI 48106, USA

8

9 **\*Correspondence:**

10 Nyeema C. Harris

11 [nyeema@umich.edu](mailto:nyeema@umich.edu)

12 † ORCID: [Nyeema C. Harris](#)

13

14 **Keywords:** Urban, cottontail rabbit, Detroit, coyote, anti-predator

15

16

17

18

19

20

21

22

23

*Manuscript currently in review at Frontiers in Ecology and Evolution (Updated June 2020)*  
**Urban Ecology Section – Behavioral adaptations to life in the city**

24 **Abstract**

25 Rapid urbanization coupled with increased human influence induces pressures that affect  
26 predator-prey relations through a suite of behavioral mechanisms, including alteration of  
27 avoidance and coexistence dynamics. Synergisms of natural and anthropogenic threats existing  
28 within urban environments exacerbate the necessity for species to differentially modify behavior  
29 to each risk. Here, we explore the behavioral response of a key prey species, cottontail rabbits  
30 (*Sylvilagus floridanus*), to anthropogenic and naturogenic pressures in a human-dominated  
31 landscape by examining their vigilance levels in green spaces within the city of Detroit,  
32 Michigan. We conducted the first camera survey in urban parks throughout Detroit in 2017-2020  
33 to assess vigilance behavior corresponding to a heterogeneous landscape of risks stimulated by  
34 humans, domestic dogs, and a natural predator, coyotes (*Canis latrans*). We predicted a scaled  
35 response where cottontail rabbits would be most vigilant in areas with high coyote activity,  
36 moderately vigilant in areas with high domestic dog activity, and the least vigilant in areas of  
37 high human activity. From 8,165 independent cottontail rabbit detections in Detroit across  
38 11,616 trap nights, one-third were classified as vigilant. We found no significant impact of  
39 humans or coyotes spatial hotspots, but vigilance behavior in rabbits significantly increased in  
40 hotspots of high activity from domestic dogs. We found little spatial overlap between rabbits and  
41 threats, suggesting rabbits invest more in spatial avoidance; thus, less effort is required for  
42 vigilance. Our results elucidate strategies of a prey species coping with various risks to advance  
43 our understanding of the adaptability of wildlife in urban environments. In order to foster safe  
44 and positive interactions between people and wildlife in urban greenspaces, we must understand  
45 and anticipate the ecological implications of human-induced behavioral modifications.

46

47

48

49

50

51

52

53

54

55

*Manuscript currently in review at Frontiers in Ecology and Evolution (Updated June 2020)*  
**Urban Ecology Section – Behavioral adaptations to life in the city**

56 **Introduction**

57           The 20th and 21st centuries have seen unprecedented population growth and expansion of  
58 cities, with 60% of the global population expected to live in urban centers by the year 2030  
59 (United Nations, 2018). Urbanization coupled with other increased anthropogenic pressures has  
60 fundamentally changed ecosystems worldwide (Foley et al 2005, Grimm et al 2008, Pickard et al  
61 2017). Cities fragment natural habitats to restrict gene flow, change species assemblages, and  
62 alter the behavior of animals and people alike (Romano 2002, Tigas et al 2002, Crooks et al  
63 2004, Lowry et al 2013, Johnson and Munshi-South 2017). These changes in the environment  
64 further have implications for the wildlife that co-occur with humans and a myriad of ecological  
65 interactions including predator-prey relationships.

66           Non-consumptive fear effects induced by humans are pervasive in urban environments  
67 and drive behavioral changes in wildlife (Ciuti et al 2012, Gaynor et al 2018). For example,  
68 eastern grey squirrels (*Sciurus carolinensis*) in New York City have become sensitive to human  
69 movements and show behavioral plasticity in their ability to adjust flight initiation distance based  
70 on human activity (Bateman and Fleming 2014). Exposure to human audio cues reduced  
71 foraging time and increased the amount of time spent being vigilant in badgers (*Meles meles*) in  
72 Great Britain as compared to exposure to non-human predator audio cues (Clinchy et al 2016).  
73 Behavioral plasticity in predator and prey species alike directly influence their ability to avoid  
74 and coexist with intense human pressures in urban centers (Muhly et al 2011, Lowry et al 2013).  
75 While prey modify their behavior to avoid attempted predation, predators modify their behavior  
76 to account for prey behavior and to increase the likelihood of success of their predation attempts.  
77 Specifically, prey are forced to modify their behavior spatially or temporally to avoid threats  
78 from humans as well as associated domestic animals or natural predators (Fenn and Macdonald

*Manuscript currently in review at Frontiers in Ecology and Evolution (Updated June 2020)*  
**Urban Ecology Section – Behavioral adaptations to life in the city**

79 1995, Gliwicz et al 2008, Reilly et al 2017). Modification of behavior has therefore become  
80 necessary for the survival of both predators and prey in urban environments, as risks govern  
81 behavior (Lima 1998). However, despite the recent burgeoning of urban ecology studies, how  
82 humans and domestic animals alter mammalian vigilance behavior remains understudied.

83       Highly adaptable species and those with relatively smaller body sizes are more successful  
84 at coexisting with humans in urban areas (Bateman and Flemming 2012). Carnivores,  
85 particularly large bodied carnivores, have historically faced intense persecution from humans  
86 (Munoz-Fuentes et al. 2010). Large predators depredate livestock and compete with humans for  
87 resources including space and prey, often resulting in humans employing lethal interventions  
88 (Mech 1995, Witmer and Whittaker 2001, Treves 2003, Muhly and Musiani 2009). However,  
89 many mid to small-sized predators are able to exist successfully in areas of high anthropogenic  
90 influence (Wilkinson and Smith 2001, Ikeda et al 2004). In particular, coyotes (*Canis latrans*)  
91 have adapted to living with humans in part, by exploiting anthropogenic food subsidies and  
92 shifting diurnal movement in response to human disturbance (Kitchen et al 2001, Gese and  
93 Bekoff 2004). This, in conjunction with wide extirpations of the grey wolf (*Canis lupus*), has  
94 allowed coyotes to expand their range to the entirety of the United States beyond previous  
95 restrictions to the central and western portions of the country (Crooks 1999, Hody and Kays  
96 2018). These ecological and behavioral changes in carnivores can have cascading effects on their  
97 prey species, subsequently altering their behavior.

98       Concurrent with predators employing strategies for coexistence, their prey must also  
99 mitigate risks in human dominated landscapes. Threats for prey species in urban environments  
100 are often exacerbated by multiple sources including direct mortality from natural and  
101 anthropogenic sources. Prey may employ similar strategies to mitigate risks from humans as they

*Manuscript currently in review at Frontiers in Ecology and Evolution (Updated June 2020)*  
**Urban Ecology Section – Behavioral adaptations to life in the city**

102 do to mitigate risks from natural predators (Frid and Dill 2002). As such, fear effects in urban  
103 environments can result in prey modifying temporal activity or habitat selection to reduce  
104 predation risks (Chambers and Dickman 2002, Dowding et al. 2010). In a dynamic landscape full  
105 of risks, prey species must differentiate risk-levels and respond in accordance with the most  
106 immediate and fatal considerations inducing the strongest anti-predator strategies. Such  
107 discernment requires delegating time to vigilance in order to assess and respond to risks across  
108 the landscape while also fulfilling reproductive needs. However, there are tradeoffs because  
109 more time spent being vigilant means less time foraging, mating, and performing other behaviors  
110 like grooming (Quenette 1990). Environmental conditions including vegetation height, tree  
111 cover, and the distribution of water sources can interact to produce varying levels of predation  
112 risk and thus influence the amount of time prey spend being vigilant (Scheel 1993, Tchabovsky  
113 et al 2001).

114 Cottontail rabbits (*Sylvilagus floridanus*) are a key prey source for many mammalian  
115 carnivores as well as avian predators and occasionally snakes in urban environments throughout  
116 the United States (Beasom and Moore 1977, Litvaitis and Shaw 1980, Wittenberg 2012).  
117 Cottontail rabbits have high reproductive rates that result in rapidly growing populations that  
118 interact, directly or indirectly, with humans in gardens, yards, parks and other green spaces  
119 throughout city limits (Hunt et al 2014, Baker et al 2015). We conducted a non-invasive camera  
120 survey to investigate the vigilance behavior of rabbits in response to anthropogenic and natural  
121 threats. Our work occurred throughout Detroit, the largest city in Michigan, located in the Great  
122 Lakes region of the USA from 2017-2020. Here, we delineated human, coyote, and domestic dog  
123 risk zones to detect differences in cottontail vigilance response and investigated the potential  
124 factors influencing vigilance.

*Manuscript currently in review at Frontiers in Ecology and Evolution (Updated June 2020)*  
**Urban Ecology Section – Behavioral adaptations to life in the city**

125           The gray squirrel (*Sciurus carolinensis*), another common urban prey species, is less  
126 wary of humans in areas more densely populated by humans as opposed to areas less densely  
127 populated by humans (Parker and Nillon 2008). Therefore, we expect a similar level of  
128 acclimation in cottontail rabbits where they are less vigilant in areas heavily populated by  
129 humans. Because of the similarities in body size and behavior between domestic dogs and  
130 coyotes, we anticipate rabbits will show more vigilance in areas with high domestic dog presence  
131 than areas with high human presence. However, as domestic dogs are generally associated with  
132 humans, we expect the response to dogs to be less dramatic than the response to coyotes.  
133 Therefore, we expect a scaled response where rabbits will be least vigilant in areas with high  
134 human activity, with vigilance response increasing slightly in the areas with high domestic dog  
135 activity, and the most vigilance being displayed in areas of high coyote activity, as coyotes are an  
136 actual formidable predator of rabbits (Figure 1).

137

## 138 **Materials and Methods**

### 139 **Study Site**

140           We implemented a systematic camera survey throughout metro parks in Detroit, the  
141 largest city in Michigan covering 359.2 km<sup>2</sup> of land (Figure 2). The declining city holds a human  
142 population of 672,000 people with an average density of ~5,144 people per square mile (U.S.  
143 Census Bureau, 2016). The Detroit metro park system contributes to the green space and  
144 available habitat for wildlife within the city. All 28 total parks sampled within the city are  
145 intrinsically impacted (whether directly or indirectly) by humans and are embedded within an  
146 urban matrix including roads, neighborhoods, and buildings. The parks range in size from ~0.016  
147 - 4.79 km<sup>2</sup> with varying levels of vegetation and human influence. In Detroit, the largest native

*Manuscript currently in review at Frontiers in Ecology and Evolution (Updated June 2020)*  
**Urban Ecology Section – Behavioral adaptations to life in the city**

148 carnivore present is the coyote. However, domestic dogs are also present and may exert pressures  
149 on the coyote's natural prey species such as rabbits.

150

151 **Data Collection/Camera Survey**

152 We deployed unbaited, remotely triggered cameras (Reconyx© PC 850, 850C, 900,  
153 900C) throughout city parks to monitor the wildlife community from October – March in 2017-  
154 2020. Placement within the parks was determined based on evidence of wildlife presence and  
155 vegetation type. Park size determined the number of cameras deployed, ranging from 1-7  
156 cameras. For parks with multiple cameras, we deployed cameras with a minimum distance of  
157 500m between individual cameras. Cameras were affixed to medium sized trees approximately  
158 0.5-1m off of the ground. Cameras were programmed to take three images when triggered at  
159 high sensitivity with one second between each image and a 15 second quiet period. Every image  
160 was independently sorted and confirmed by at least two members of the Applied Wildlife  
161 Ecology Lab at the University of Michigan. We only used images confirmed as rabbit as well as  
162 their associated threat species of interests: humans, domestic dogs, and coyotes. Team members  
163 were excluded from human images.

164

165 **Hotspot Analysis**

166 To determine the level of risk from each of our three potential predator focal species, we  
167 calculated kernel density to identify significant hotspots of activity using ArcMap (v. 10.6.1).  
168 The resultant heat map indicated areas of high occurrence for coyotes, domestic dogs, and  
169 humans. We then overlaid kernel density values for each threat with hotspots for rabbits to  
170 calculate the relative overlap. Finally, using the Getis-Ord-GI\* statistic, we tested for significant

*Manuscript currently in review at Frontiers in Ecology and Evolution (Updated June 2020)*  
**Urban Ecology Section – Behavioral adaptations to life in the city**

171 overlap of kernel densities at a camera level to signal spatial avoidance. Evidence of spatial  
172 avoidance may represent a sufficient evasion strategy that necessitates less vigilance behavior.

173

174 **Vigilance Scoring**

175 We extracted behavioral information from images in order to quantify vigilance response  
176 in cottontail rabbits. For each image containing a rabbit, we scored vigilance based upon the  
177 position of the body and head (Figure 3). For images with two individuals, each individual was  
178 given its own classification and counted as independent from other individuals in the image.

179 Rabbits were considered “vigilant” if their head was in an upright position; while “non-vigilant”

180 was assigned when their head was down in a foraging position. For images where the rabbit did

181 not display an obvious head up or head down stance, we used six other classifications: moving,

182 active, eating, sniffing, out of frame, and unknown. “Moving” included any rabbit in motion,

183 which was often indicated by motion blur in the images. We considered moving to be a potential

184 indicator of vigilance as it could denote rabbits leaving an area due potentially to a detected

185 threat. “Sniffing” included rabbit attention turned to monitoring an aspect of its environment

186 with its head up such as sniffing twigs. Because we are investigating the impact of canid species

187 on rabbit behavior and canids often mark their territory (Bowen and Cowan 1980), we

188 considered sniffing to potentially indicate vigilance as it is a show of risk assessment. “Active”

189 was used for activity where the animal’s attention was pointed inward at themselves. This

190 included any rabbits scratching, licking, or otherwise attending to their fur, this also included

191 stretching. “Eating” was used in the event that a rabbit had its head up, but clearly had vegetation

192 in its mouth or the image series showed it chewing. Although both active and eating involve

193 attention being pointed inward at the rabbit, we did not include them as non-vigilant in our



*Manuscript currently in review at Frontiers in Ecology and Evolution (Updated June 2020)*  
**Urban Ecology Section – Behavioral adaptations to life in the city**

194 analysis as we could not confirm non-vigilance. “Out of frame” included any images where the  
195 rabbit exited the frame of the picture and nothing was in the image. Images that were sorted as  
196 out of frame were removed from the data set and not counted in the final total. Finally,  
197 “unknown” was used for rabbits where only parts of the whole body were in the picture, the head  
198 was too blurry to determine, or if the body position could not be determined for any other reason.  
199 Unknown photos were not removed from the final total. Each individual was only designated one  
200 category per each image in which it appeared. All images with rabbits present were used to best  
201 estimate the amount of time actually spent in front of the camera at the particular station. We  
202 only used photos where rabbits were in the frame, meaning our photos are estimates of time  
203 spent in frame. Each image was scored independently for vigilance by at least two members of  
204 the Applied Wildlife Ecology Lab at the University of Michigan. Any discrepancies that were  
205 not resolved resulted in classifying the image as unknown.

206         We calculated multiple metrics of vigilance as a response variable to each risk factor.  
207 Initially, we used the raw number of images classified as vigilant per camera. Our second  
208 measure of vigilance was the ratio of vigilant photos to the total number of photos. This was used  
209 as a proxy for the relative amount of time spent being vigilant at each camera. For both these  
210 metrics, we expanded the classification of vigilant beyond head up versus head down and  
211 included moving and sniffing as vigilant. We used the total raw counts for these combined  
212 categories as well as the ratio of those categories out of the total number of detections as our  
213 “vigilant” response variable.

214

215 **Statistical Analysis**

*Manuscript currently in review at Frontiers in Ecology and Evolution (Updated June 2020)*  
**Urban Ecology Section – Behavioral adaptations to life in the city**

216 We used negative binomial generalized linear models (GLM.nb) to determine which  
217 factors best explained cottontail rabbit vigilance. We used results from the hotspot analysis to  
218 identify locations of significant high use based on kernel density estimates from detection data to  
219 categorize threat levels for humans, domestic dogs, and coyotes. This resulted in a binary  
220 explanatory variable indicating whether a hotspot was presence or absence for each threat. We  
221 also included environmental and abiotic factors in our analysis. Distance from each camera  
222 station to water sources (WATER), to roads (ROADS), and the area of each park (AREA, in  
223 acres) was calculated using ArcMap. Understory cover (VEG) was quantified as a binary  
224 variable of whether trees, tall shrubs or bushes, but not grass were present or not in the field of  
225 view at the camera level.

226 Support for models was evaluated using Akaike's Information Criterion (AICc) to select  
227 top-performing model ( $\Delta AIC < 2$ ) with highest weight ( $w$ ). We completed modeling and model  
228 selections using the 'lme4' and 'MuMIn' packages in R.

229

## 230 **Results**

231 We obtained 8,165 independent cottontail rabbit detections in Detroit across 11,616 trap  
232 nights from our 2017-2020 camera trap surveys. Additionally, we recorded 1,345 humans, 484  
233 domestic dogs, and 271 coyotes. Three stations (one in 2017 and two in 2019) had no coyote,  
234 domestic dog, or human detections. No cameras had significant densities for all three threat  
235 species at the same station for the entire duration of study based on Getis-Ord  $G_i^*$  statistics  
236 (Figure 4). Instead, coyotes had significant densities at only one station in 2019. Domestic dogs  
237 had significant densities at the same station across two different years. Humans had significant  
238 densities at three stations across the three years of study, with two of those stations recurring

*Manuscript currently in review at Frontiers in Ecology and Evolution (Updated June 2020)*  
**Urban Ecology Section – Behavioral adaptations to life in the city**

239 across years. Rabbits had significant densities at the same two stations across two years. These  
240 hotspots overlapped with significant dog densities in two years at the same station. However, we  
241 saw no significant overlap between rabbits and humans or coyotes (Figure 4).

242 Of the rabbit detections, with vigilance being determined by head position, we  
243 categorized 2,774 images as vigilant (i.e, head-up, 34%) and 1,327 images as non-vigilant (i.e.  
244 head down, 16.3%). The remaining 4,064 photos were classified into the following categories:  
245 17.4% moving, 1% active, 1.8% sniffing, and 1% eating. Over a quarter of the total images were  
246 either unknown or out of frame, with out of frame photos removed from analysis. We found that  
247 vigilance did significant vary by threat level ( $\chi^2 = 37.74$ ,  $p < 0.0001$ ) with a greater response  
248 induced by domestic dogs (Figure 5).

249 Models further support differential effects of threats on rabbit vigilance. The top model  
250 (highest  $w$  with  $\Delta AIC < 2$ ) indicated that the presence of domestic dog hotspots ( $\beta = 2.12$ ,  
251  $p = 0.016$ ), distance to water ( $\beta = 0.0002$ ,  $p = 0.046$ ), and vegetation cover ( $\beta = 0.837$ ,  $p = 0.0171$ )  
252 all positively influenced vigilance (Table 1). Though park size and the presence of human  
253 hotspots are in other top models, neither of these variables had significant beta coefficients in  
254 explaining rabbit vigilance. Results were consistent when using the extended categories of  
255 vigilance to include moving and sniffing. The intercept only model was included in top models  
256 when using ratio of vigilance photos with the extended categories of vigilance as response  
257 variables. Therefore, we did not have enough explanatory power to investigate other factors  
258 influencing the proportion of vigilance behavior.

259

260 **Discussion**

*Manuscript currently in review at Frontiers in Ecology and Evolution (Updated June 2020)*  
**Urban Ecology Section – Behavioral adaptations to life in the city**

261           Urban wildlife must employ various behavioral strategies to cope with risks in their  
262 environment from naturogenic and anthropogenic sources (Blecha et al 2018, Stillfried et al  
263 2017). Like other urban prey species, cottontail rabbits are facing ever changing dynamics of  
264 predation threats in an increasingly urbanized world (Santiago-Alarcon 2017, Duarte and Young  
265 2011, Mccleery 2009). We anticipated a scaled response where rabbits showed the lowest  
266 vigilance in areas of high human density, then progressively increased with in areas of high  
267 domestic dog density and even more in areas of high coyote density. Although we did not see the  
268 scaled response in the direction we expected, our analysis showed that in the presence of  
269 domestic dogs, rabbit vigilance behavior is heightened and rabbits exhibited the least amount of  
270 vigilance in response to humans. Furthermore, distance to water and vegetation cover also  
271 increased vigilance level significantly.

272           While it is possible rabbits have acclimated to human presence (Dunagun et al. 2019,  
273 Samia et al. 2015), their response to domestic dogs indicates that they continue to perceive them  
274 as a threat. Domestic dogs are morphologically similar to coyotes, but occupy much higher  
275 densities in urban areas and may represent a novel threat similar enough to a natural predator to  
276 induce a stronger vigilance response. Coyotes may not occur above the density threshold  
277 required to induce behavioral modifications in rabbits in Detroit. Dogs may have functionally  
278 replaced coyotes in this capacity posing greater predation risk to cottontail rabbits. Similarly,  
279 vigilance behavior increased in association with domestic dogs, but not coyotes in white-tailed  
280 deer (*Odocoileus virginianus*) in the mid-Altantic region of the United States (Schuttler et al.  
281 2017).

282           Ziege et al. (2016) found European rabbits were less vigilant in urban areas as compared  
283 to their counterparts in rural areas. This suggests that perhaps the important difference in

*Manuscript currently in review at Frontiers in Ecology and Evolution (Updated June 2020)*  
**Urban Ecology Section – Behavioral adaptations to life in the city**

284 vigilance lies in the urban-rural gradient, rather than entirely within the urban matrix. Similar to  
285 rural areas where there is more vegetation cover than urban areas, we found vigilance increased  
286 within areas with more vegetation cover. Rabbits occurring in areas with more vegetative cover  
287 increased their vigilance, which could indicate fear that the covered environment may obscure  
288 predators. In Missouri, Jones et al. (2014) reported that forest cover did not influence rabbit or  
289 squirrel occupancy across an urban-rural gradient study. We also found that as rabbits moved  
290 further away from water their vigilance level increased, which could reflect increased exposure  
291 to more disturbed areas in the urban matrix. Urban systems represent a novel landscape for  
292 rabbits that requires dynamic changes in vigilance based on the environment and threats of  
293 specific locations within the landscape.

294         Our hotspot analysis indicated very little spatial overlap between species, with domestic  
295 dogs and rabbits being the only two species to have significant densities at the same camera  
296 location in the same year. As a result, we conclude that generally, rabbits are investing more in  
297 spatial avoidance, requiring less effort for vigilance. By mostly avoiding their predators, rabbits  
298 may be better able to maintain constant levels of vigilance across the landscape rather than  
299 heightening vigilance in areas their predators occupy at significant densities. These hotspots of  
300 activity might also be confounded by other factors impacting vigilance that were not  
301 incorporated in our models. For example, rabbits might be selecting environments based on  
302 proximity to housing, overall vegetation density, or grass cover that might be less desirable for  
303 their predators, allowing the rabbits to spend less time being vigilant.

304         Notably, our analysis was limited in scope by only examining behavior in areas where  
305 these species co-occur. It is entirely possible that spatial or temporal partitioning plays a larger  
306 role in mediating predator-prey interactions than vigilance solely in prey. We examined

*Manuscript currently in review at Frontiers in Ecology and Evolution (Updated June 2020)*  
**Urban Ecology Section – Behavioral adaptations to life in the city**

307 interactions within patches in the city, but neglected to examine the amount of interaction  
308 occurring between these spaces. Quantifying the level of risks between patches in the city could  
309 be the next step in examining threat impacts on prey behavior. Furthermore, seasonality may  
310 influence vigilance behavior and interact with food availability. Our survey did not sample  
311 during warmer months. One could argue risk assessment in cottontail rabbits may be more  
312 extreme than the winter months when predators are likely more active.

313         A growing number of studies on prey behavior have shown increasing evidence for  
314 multiple factors, including human influence and urbanization, affecting predator prey dynamics  
315 (Gallo et al 2019, Magle et al 2014). Our work contributes to this growing number of studies on  
316 urban wildlife and particularly predator-prey dynamics within urban systems. Understanding the  
317 dynamics of predators and their prey in urban systems will be key to the continued coexistence  
318 of wildlife and humans in urban spaces. Our results elucidate how a common prey species  
319 change, or fail to change, their vigilance behavior across anthropogenic and naturogenic risk  
320 factors in an urban ecosystem. Ultimately, these findings advance our understanding of the  
321 adaptability of wildlife in human-dominated environments.

322

323

324 **Author contributions**

325 S.L and N.C.H. conceived the study. S.L. wrote the manuscript and conducted analysis with  
326 support from S.G. and N.C.H. S.L. and N.A. designed graphics. All authors contributed to field  
327 efforts, data curation, and editing the manuscript. N.C.H. secured funding and supervised work.

328

329 **Acknowledgements**

*Manuscript currently in review at Frontiers in Ecology and Evolution (Updated June 2020)*  
**Urban Ecology Section – Behavioral adaptations to life in the city**

330 First, we recognize implementing our field research with camera traps was conducted on lands  
331 originally belonging to the People of the Three Fires. We sincerely thank members past and  
332 present of the Applied Wildlife Ecology (AWE) Lab at the University of Michigan, specifically  
333 R. Malhotra, S. Bower, and G. Gadsden who contributed to the data collection, image sorting,  
334 and logistical support of this project. We also thank the University of Michigan Undergraduate  
335 Research Opportunities and the honors committee (P. Tucker, A. Ostling) for support of S. Lima  
336 during her B.S. degree. Finally, we extend our appreciation to our partners at the Detroit  
337 Zoological Society for their financial support and the City of Detroit for collaboration, permits,  
338 and access to the parks in our study.

339

*Manuscript currently in review at Frontiers in Ecology and Evolution (Updated June 2020)*  
**Urban Ecology Section – Behavioral adaptations to life in the city**

340 **References**

- 341 Baker, M. A. A., Emerson, S. E., and Brown, J. S. (2015). Foraging and habitat use of eastern  
342 cottontails (*Sylvilagus floridanus*) in an urban landscape. *Urban ecosystems*, 18(3), 977-987.
- 343 Bateman, P. W., and Fleming, P. A. (2012). Big city life: carnivores in urban  
344 environments. *Journal of Zoology*, 287(1), 1-23.
- 345 Bateman, P. W., and Fleming, P. A. (2014). Does human pedestrian behaviour influence risk  
346 assessment in a successful mammal urban adapter? *Journal of Zoology*, 294(2), 93-98.
- 347 Beasom, S. L., and Moore, R. A. (1977). Bobcat food habit response to a change in prey  
348 abundance. *The Southwestern Naturalist*, 451-457.
- 349 Blecha, K. A., Boone, R. B., and Alldredge, M. W. (2018). Hunger mediates apex predator's risk  
350 avoidance response in wildland–urban interface. *Journal of Animal Ecology*, 87(3), 609-622.
- 351 Bowen, W. D., and Cowan, I. M. (1980). Scent marking in coyotes. *Canadian Journal of*  
352 *Zoology*, 58(4), 473-480.
- 353 Chambers, L. K., and Dickman, C. R. (2002). Habitat selection of the long-nosed bandicoot,  
354 *Perameles nasuta* (Mammalia, Peramelidae), in a patchy urban environment. *Austral*  
355 *Ecology*, 27(3), 334-342.
- 356 Ciuti, S., Northrup, J. M., Muhly, T. B., Simi, S., Musiani, M., Pitt, J. A., and Boyce, M. S.  
357 (2012). Effects of humans on behaviour of wildlife exceed those of natural predators in a  
358 landscape of fear. *PloS one*, 7(11).
- 359 Clinchy, M., Zanette, L. Y., Roberts, D., Suraci, J. P., Buesching, C. D., Newman, C., and  
360 Macdonald, D. W. (2016). Fear of the human “super predator” far exceeds the fear of large  
361 carnivores in a model mesocarnivore. *Behavioral Ecology*, 27(6), 1826-1832.



*Manuscript currently in review at Frontiers in Ecology and Evolution (Updated June 2020)*  
**Urban Ecology Section – Behavioral adaptations to life in the city**

- 362 Crooks, K. R., and Soulé, M. E. (1999). Mesopredator release and avifaunal extinctions in a  
363 fragmented system. *Nature*, 400(6744), 563-566.
- 364 Crooks, K. R., Suarez, A. V., and Bolger, D. T. (2004). Avian assemblages along a gradient of  
365 urbanization in a highly fragmented landscape. *Biological conservation*, 115(3), 451-462.
- 366 Dowding, C. V., Harris, S., Poulton, S., and Baker, P. J. (2010). Nocturnal ranging behaviour of  
367 urban hedgehogs, *Erinaceus europaeus*, in relation to risk and reward. *Animal*  
368 *Behaviour*, 80(1), 13-21.
- 369 Duarte, M. H., and Young, R. J. (2011). Sleeping site selection by urban marmosets (*Callithrix*  
370 *penicillata*) under conditions of exceptionally high predator density. *International Journal of*  
371 *Primates*, 32(2), 329-334.
- 372 Dunagan, S.P., Karels, T.J., Moriarty, J.G., Brown, J.L., and Riley, S.P.D. (2019). Bobcat and  
373 rabbit habitat use in an urban landscape. *Journal of Mammalogy* 100(2): 401-409.
- 374 Fenn, M. G., and Macdonald, D. W. (1995). Use of middens by red foxes: risk reverses rhythms  
375 of rats. *Journal of Mammalogy*, 76(1), 130-136.
- 376 Foley, J. A., DeFries, R., Asner, G. P., Barford, C., Bonan, G., and Carpenter, S. R et al. (2005).  
377 Global consequences of land use. *science*, 309(5734), 570-574.
- 378 Frid, A., and Dill, L. (2002). Human-caused disturbance stimuli as a form of predation  
379 risk. *Conservation Ecology*, 6(1).
- 380 Gallo, T., Fidino, M., Lehrer, E. W., and Magle, S. (2019). Urbanization alters predator-  
381 avoidance behaviours. *Journal of Animal Ecology*, 88(5), 793-803.
- 382 Gaynor, K. M., Hohnowski, C. E., Carter, N. H., and Brashares, J. S. (2018). The influence of  
383 human disturbance on wildlife nocturnality. *Science*, 360(6394), 1232-1235.

*Manuscript currently in review at Frontiers in Ecology and Evolution (Updated June 2020)*  
**Urban Ecology Section – Behavioral adaptations to life in the city**

- 384 Gese E.M., and Beckoff M. (2004). Coyote *Canis Latrans*. In Sillero-Zubiri, C., Hoffmann, M.,  
385 and Macdonald, D. W. (Eds.). (2004). *Canids: foxes, wolves, jackals, and dogs: status survey*  
386 *and conservation action plan*. Gland, Switzerland: IUCN.
- 387 Gliwicz, J., and Dąbrowski, M. J. (2008, August). Ecological factors affecting the diel activity of  
388 voles in a multi-species community. In *Annales Zoologici Fennici* (Vol. 45, No. 4, pp. 242-  
389 247). Finnish Zoological and Botanical Publishing Board.
- 390 Grimm, N. B., Foster, D., Groffman, P., Grove, J. M., Hopkinson, C. S., and Nadelhoffer, K. et  
391 al. (2008). The changing landscape: ecosystem responses to urbanization and pollution across  
392 climatic and societal gradients. *Frontiers in Ecology and the Environment*, 6(5), 264-272.
- 393 Hody, J. W., and Kays, R. (2018). Mapping the expansion of coyotes (*Canis latrans*) across  
394 North and Central America. *ZooKeys*, (759), 81.
- 395 Hunt, V. M., Magle, S. B., Vargas, C., Brown, A. W., Lonsdorf, E. V., and Sacerdote, A. B. et al.  
396 (2014). Survival, abundance, and capture rate of eastern cottontail rabbits in an urban  
397 park. *Urban ecosystems*, 17(2), 547-560.
- 398 Ikeda, T., Asano, M., Matoba, Y., and Abe, G. (2004). Present status of invasive alien raccoon  
399 and its impact in Japan. *Global environmental research*, 8(2), 125-131.
- 400 Johnson, M. T., and Munshi-South, J. (2017). Evolution of life in urban  
401 environments. *Science*, 358(6363), eaam8327.
- 402 Jones, B.M., Cove, M.V., Lashley, M.A., and Jackson, V.L. (2016) Do coyotes *Canis latrans*  
403 influence occupancy of prey in suburban forest fragments? *Current Zoology* 62(1): 1-6.
- 404 Kitchen, A. M., Gese, E. M., and Schauster, E. R. (2000). Changes in coyote activity patterns  
405 due to reduced exposure to human persecution. *Canadian Journal of Zoology*, 78(5), 853-  
406 857.

*Manuscript currently in review at Frontiers in Ecology and Evolution (Updated June 2020)*  
**Urban Ecology Section – Behavioral adaptations to life in the city**

- 407 Lima, S.L. (1998) Nonlethal effects in the ecology of predator-prey interactions. *Bioscience*, 48,  
408 25-34.
- 409 Litvaitis, J. A., and Shaw, J. H. (1980). Coyote movements, habitat use, and food habits in  
410 southwestern Oklahoma. *The Journal of wildlife management*, 62-68.
- 411 Lowry, H., Lill, A., and Wong, B. B. (2013). Behavioural responses of wildlife to urban  
412 environments. *Biological reviews*, 88(3), 537-549.
- 413 Magle, S. B., Simoni, L. S., Lehrer, E. W., and Brown, J. S. (2014). Urban predator-prey  
414 association: coyote and deer distributions in the Chicago metropolitan area. *Urban*  
415 *Ecosystems*, 17(4), 875-891.
- 416 Mccleery, R. A. (2009). Changes in fox squirrel anti-predator behaviors across the urban-rural  
417 gradient. *Landscape Ecology*, 24(4), 483.
- 418 Mech, L. D. (1995). The challenge and opportunity of recovering wolf  
419 populations. *Conservation biology*, 9(2), 270-278.
- 420 Muhly, T. B., and Musiani, M. (2009). Livestock depredation by wolves and the ranching  
421 economy in the Northwestern US. *Ecological Economics*, 68(8-9), 2439-2450.
- 422 Muhly, T. B., Semeniuk, C., Massolo, A., Hickman, L., and Musiani, M. (2011). Human activity  
423 helps prey win the predator-prey space race. *PLoS One*, 6(3).
- 424 Parker, T. S., and Nilon, C. H. (2008). Gray squirrel density, habitat suitability, and behavior in  
425 urban parks. *Urban Ecosystems*, 11(3), 243-255.
- 426 Pickard, B. R., Van Berkel, D., Petrasova, A., and Meentemeyer, R. K. (2017). Forecasts of  
427 urbanization scenarios reveal trade-offs between landscape change and ecosystem  
428 services. *Landscape ecology*, 32(3), 617-634.

*Manuscript currently in review at Frontiers in Ecology and Evolution (Updated June 2020)*  
**Urban Ecology Section – Behavioral adaptations to life in the city**

- 429 Quenette, P. Y. (1990). Functions of vigilance behaviour in mammals: a review. *Acta*  
430 *Oecologica*, 11(6), 801-818.
- 431 Reilly, M. L., Tobler, M. W., Sonderegger, D. L., and Beier, P. (2017). Spatial and temporal  
432 response of wildlife to recreational activities in the San Francisco Bay ecoregion. *Biological*  
433 *conservation*, 207, 117-126.
- 434 Romano, B. (2002, October). Evaluation of urban fragmentation in the ecosystems.  
435 *In Proceedings of International Conference on Mountain Environment and Development*  
436 *(ICMED)* (pp. 15-19).
- 437 Samia, D. S. M., Nakagawa, S., Nomura, F., Rangel, T. F., and Blumstein, D. T. (2015).  
438 Increased tolerance to humans among disturbed wildlife. *Nature Communications*, 6, 8877.
- 439 Santiago-Alarcon, D., and Delgado-V, C. A. (2017). Warning! Urban threats for birds in Latin  
440 America. In *Avian Ecology in Latin American Cityscapes* (pp. 125-142). Springer, Cham.
- 441 Scheel, D. (1993). Watching for lions in the grass: the usefulness of scanning and its effects  
442 during hunts. *Animal Behaviour*, 46(4), 695-704.
- 443 Schuttler, S.G., Parsons, A.W., Forrester, T.D., Baker, M.C., McShea W.J., Costello, R., and R.  
444 Kays. 2017. Deer on the lookout: how hunting, hiking and coyotes affect white-tailed deer  
445 vigilance. *Journal of Zoology* 301:320-327.
- 446 Stillfried, M., Gras, P., Börner, K., Göritz, F., Painer, J., and Röllig, K. et al. (2017). Secrets of  
447 success in a landscape of fear: urban wild boar adjust risk perception and tolerate  
448 disturbance. *Frontiers in Ecology and Evolution*, 5, 157.
- 449 Tchabovsky, A. V., Krasnov, B., Khokhlova, I. S., and Shenbrot, G. I. (2001). The effect of  
450 vegetation cover on vigilance and foraging tactics in the fat sand rat *Psammomys*  
451 *obesus*. *Journal of Ethology*, 19(2), 105-113.

*Manuscript currently in review at Frontiers in Ecology and Evolution (Updated June 2020)*  
**Urban Ecology Section – Behavioral adaptations to life in the city**

- 452 Tigas, L. A., Van Vuren, D. H., and Sauvajot, R. M. (2002). Behavioral responses of bobcats and  
453 coyotes to habitat fragmentation and corridors in an urban environment. *Biological*  
454 *Conservation*, 108(3), 299-306.
- 455 Treves, A., and Karanth, K. U. (2003). Human-carnivore conflict and perspectives on carnivore  
456 management worldwide. *Conservation biology*, 17(6), 1491-1499.
- 457 U.S. Census Bureau. (2016). Decennial Census of Population and Housing. Retrieved from  
458 <https://www.census.gov/quickfacts/detroitcitymichigan>
- 459 Wilkinson, D., and Smith, G. C. (2001). A preliminary survey for changes in urban fox (*Vulpes*  
460 *vulpes*) densities in England and Wales, and implications for rabies control. *Mammal*  
461 *Review*, 31(1), 107-110.
- 462 Witmer, G. W., and Whittaker, D. G. (2001). Dealing with nuisance and depredating black  
463 bears. *USDA National Wildlife Research Center-Staff Publications*, 581.
- 464 Wittenberg, R. D. (2012). Foraging ecology of the timber rattlesnake (*Crotalus horridus*) in a  
465 fragmented agricultural landscape. *Herpetological Conservation and Biology*, 7(3), 449-461.
- 466 World Urbanization Prospects - Population Division. (2018). Retrieved from  
467 <https://population.un.org/wup/DataQuery/>
- 468 Ziege, M., Babitsch, D., Brix, M., Kriesten, S., Straskraba, S., and Wenninger, S et al. (2016).  
469 Extended diurnal activity patterns of European rabbits along a rural-to-urban  
470 gradient. *Mammalian Biology*, 81(5), 534-541.

*Manuscript currently in review at Frontiers in Ecology and Evolution (Updated June 2020)*  
**Urban Ecology Section – Behavioral adaptations to life in the city**

471 **Figure legends**

472

473 **Figure 1** Expected vigilance response of cottontail rabbits. Rabbit vigilance was anticipated to  
474 be highest around coyotes as they present a high predation risk, somewhat high around dogs  
475 because of their similarities to coyotes, and lowest around humans due to the likelihood that  
476 rabbits have come to see human presence as less of a threat. Vigilance was measured as the  
477 amount of time spent assessing the environment for predators by examining rabbit posture.

478

479 **Figure 2** Study site in Detroit with dots indicating camera placement including camera station  
480 locations from 2017-2020. Orange dots indicate camera stations where rabbits were detected in  
481 at least one of the years of study. Black dots indicate camera stations where no rabbits were  
482 detected in any years. All cameras were placed on trees with as much space as the park size  
483 would allow between them, with no cameras being closer than 500m.

484

485 **Figure 3** Vigilance classifications based on body positions: A) vigilant, head-up; B) non-  
486 vigilant, head down; C) active; D) eating; E) moving; and F) sniffing.

487

488 **Figure 4** Spatial use within Detroit for rabbits and their three threat species as shown by kernel  
489 density activity patterns from camera images in the city of Detroit parks from 2017-2020.  
490 Coyotes had significant densities at one station, humans had significant densities at three stations  
491 (two of these stations had significant densities for two years), dogs had significant densities at  
492 the same station across two years, and rabbits had significant densities at two stations for two  
493 years. Example data are shown for each species.

*Manuscript currently in review at Frontiers in Ecology and Evolution (Updated June 2020)*  
**Urban Ecology Section – Behavioral adaptations to life in the city**

494 **Figure 5** Proportion of vigilant to non-vigilant rabbit photos in the presence of each threat  
495 species. Rabbits showed the highest proportion of vigilance in the presence of domestic dogs.

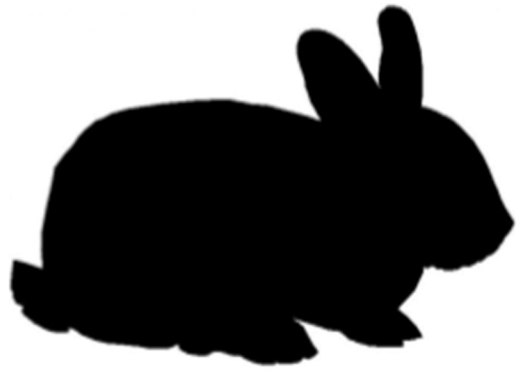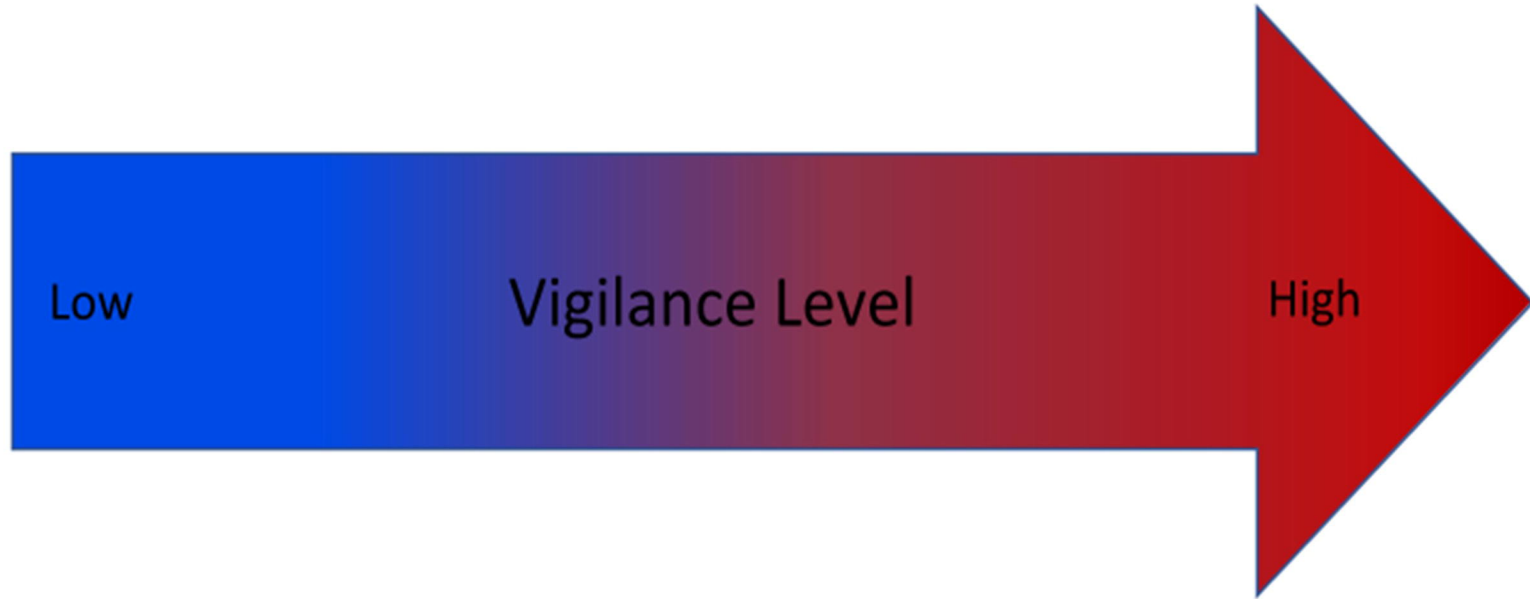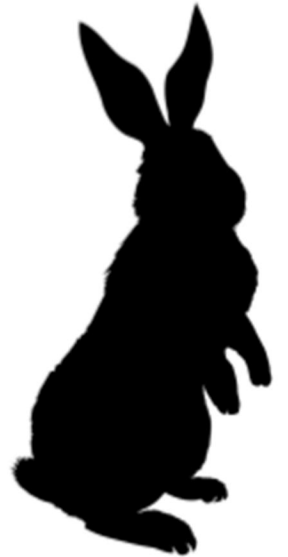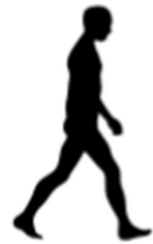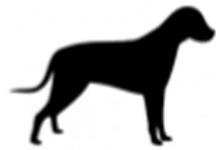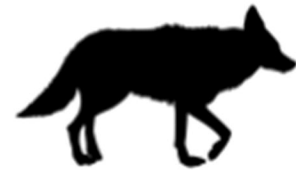

Perceived Threat Level

Low

High



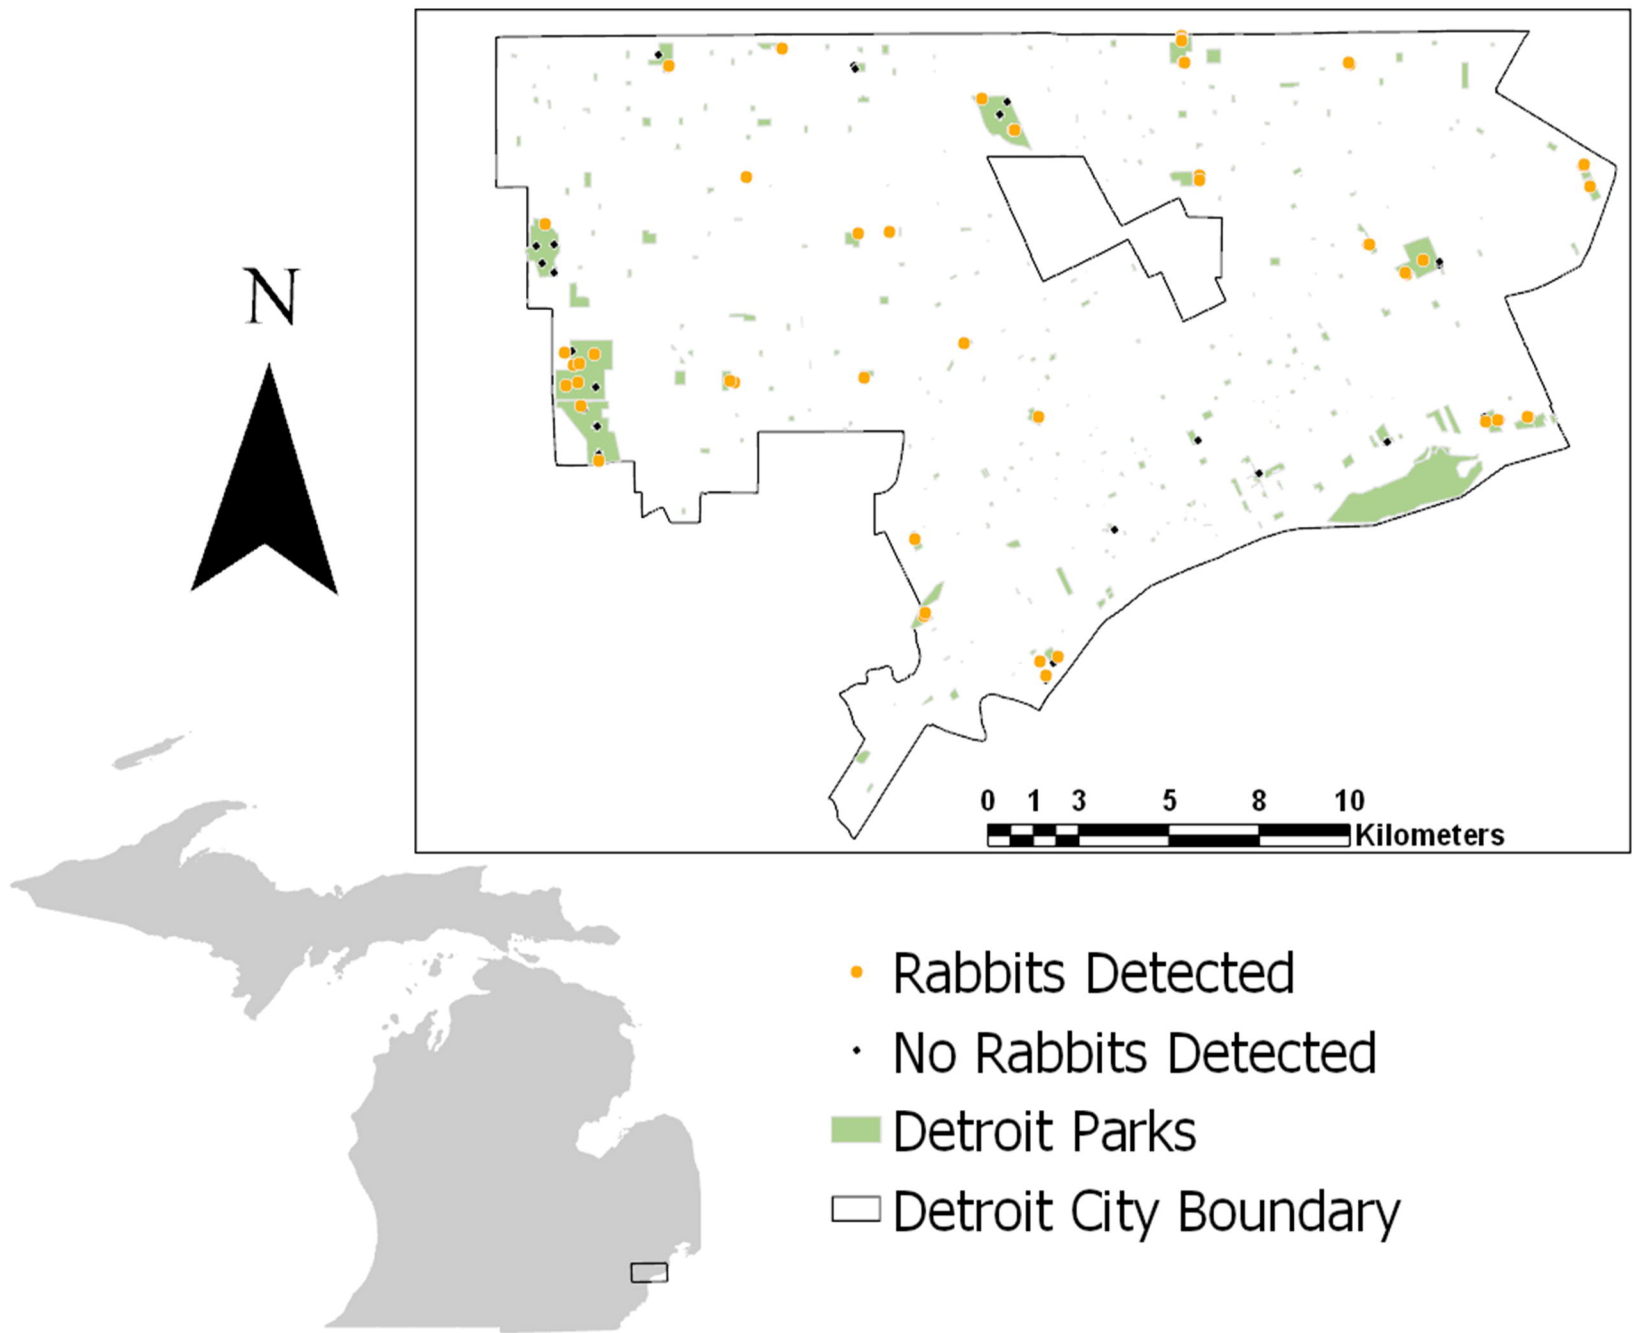

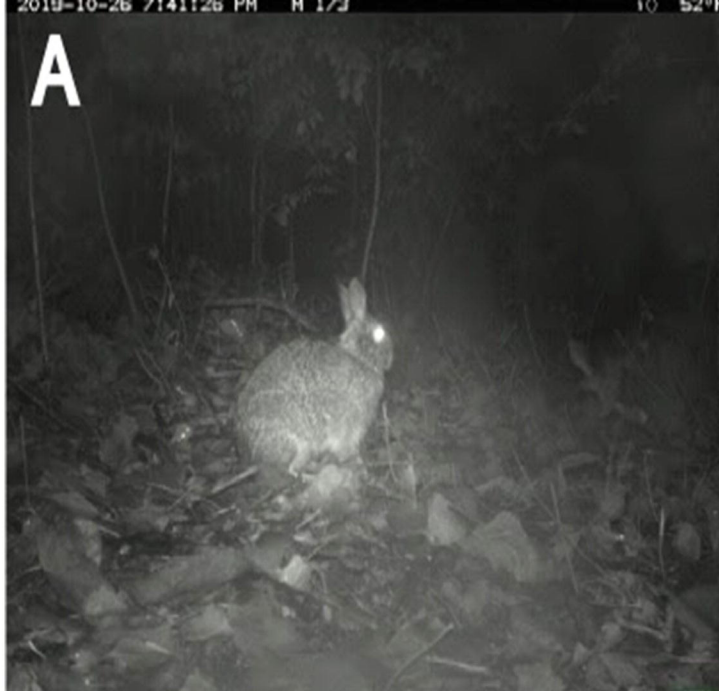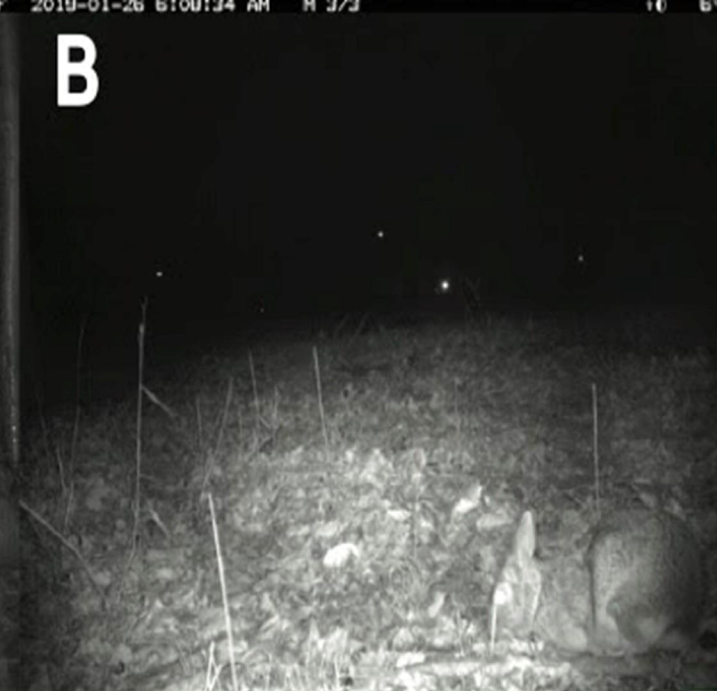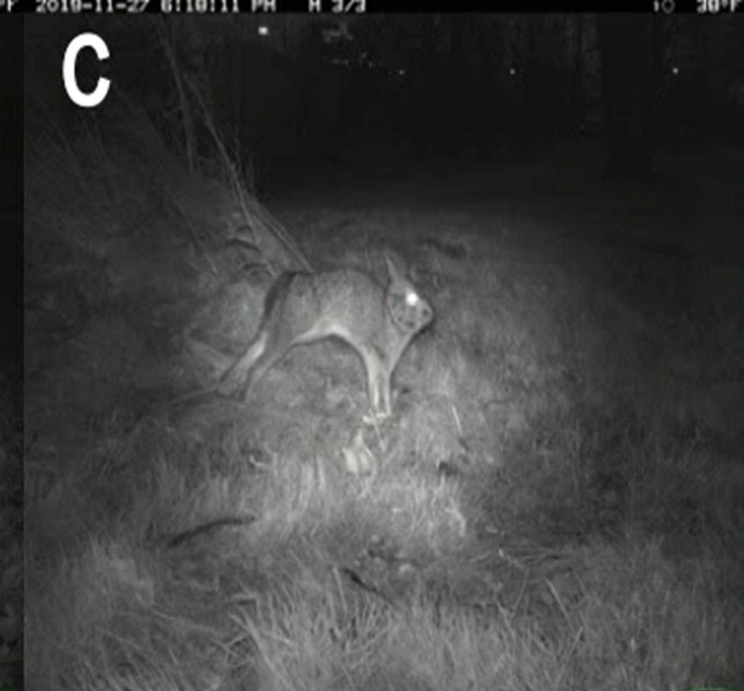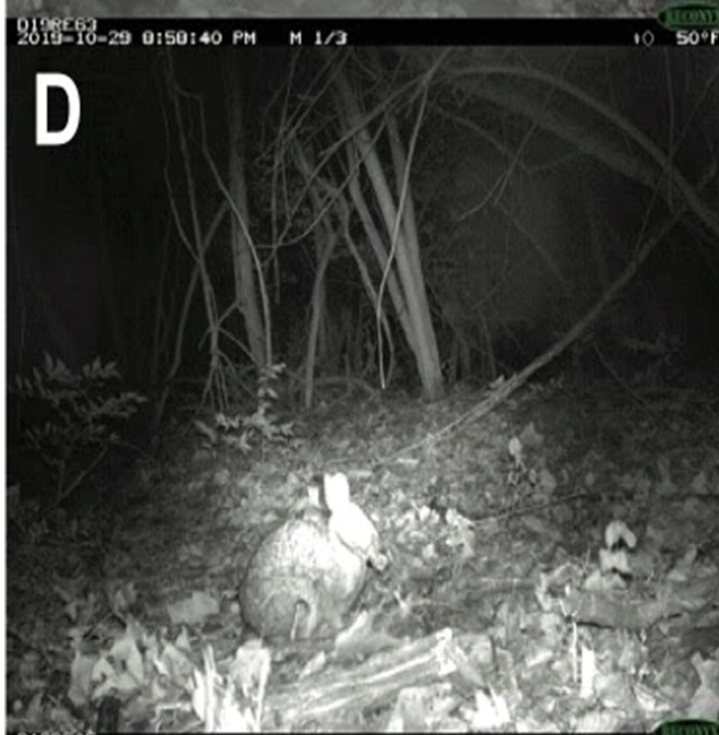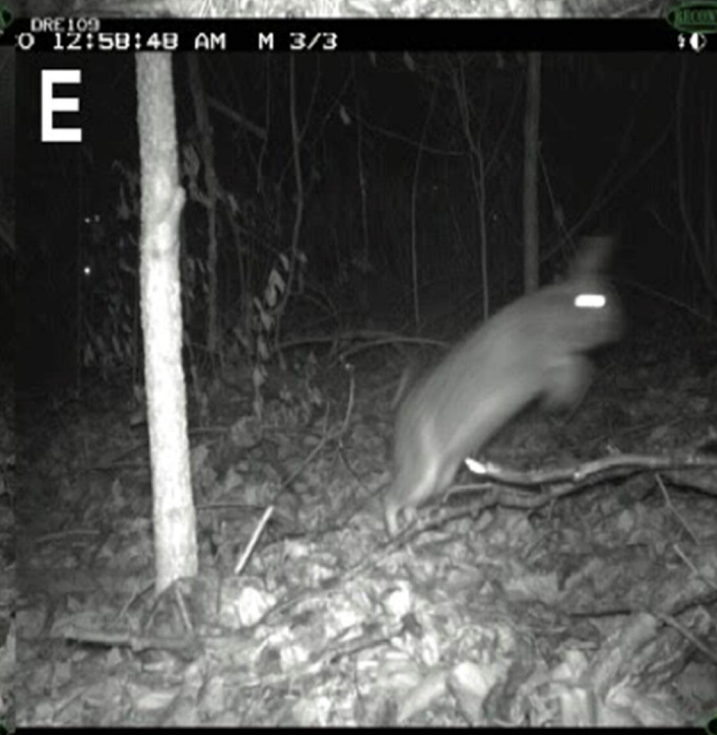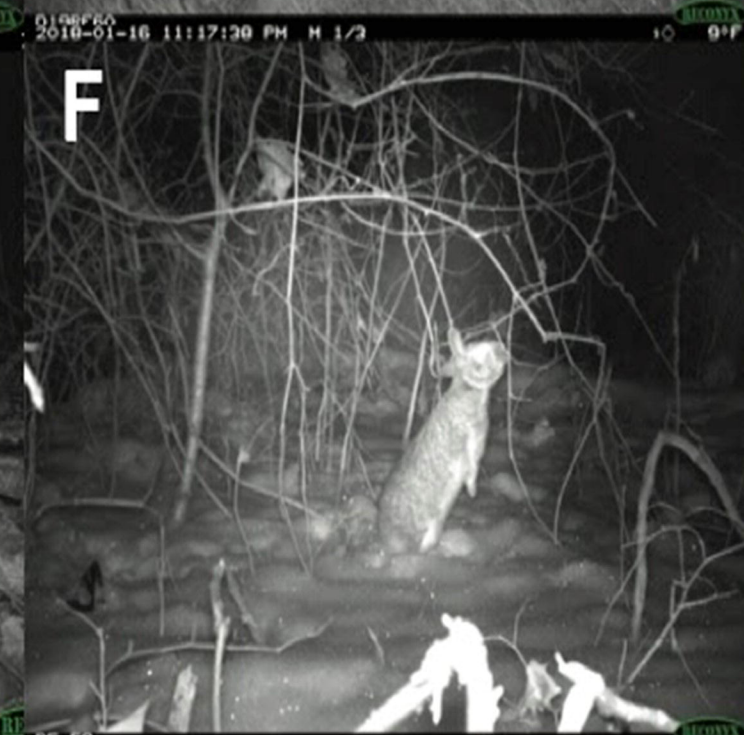

**Coyote**

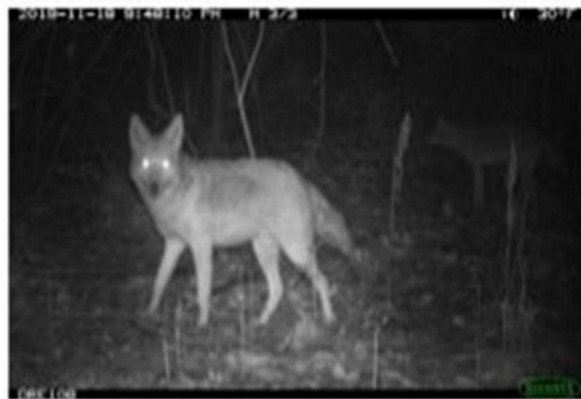

**Domestic Dog**

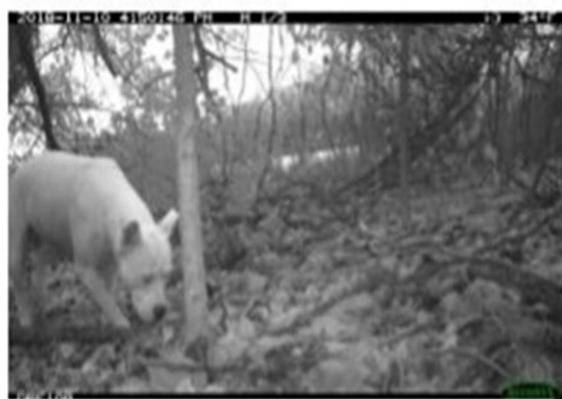

**Human**

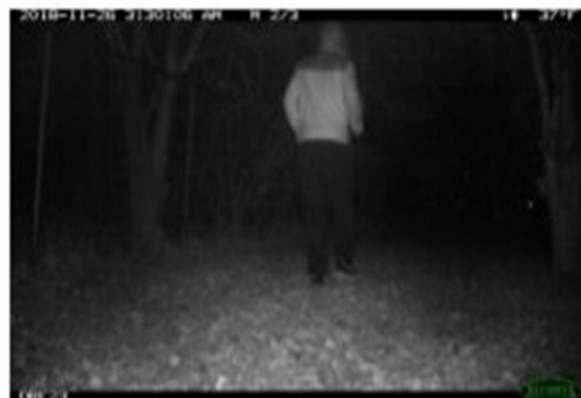

**Cottontail Rabbit (subject)**

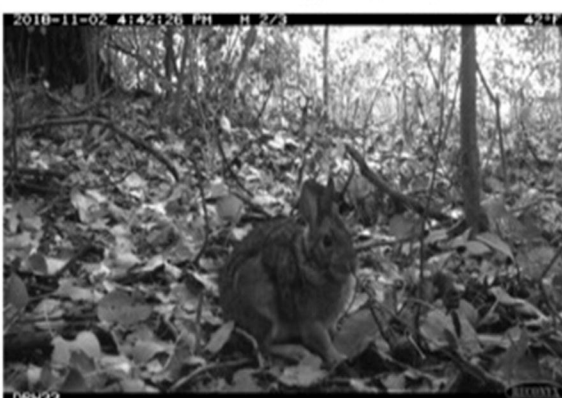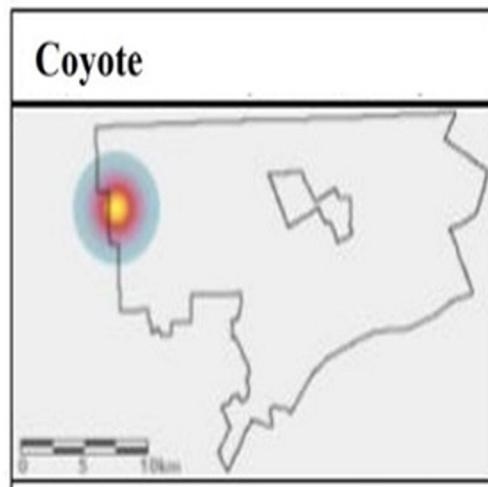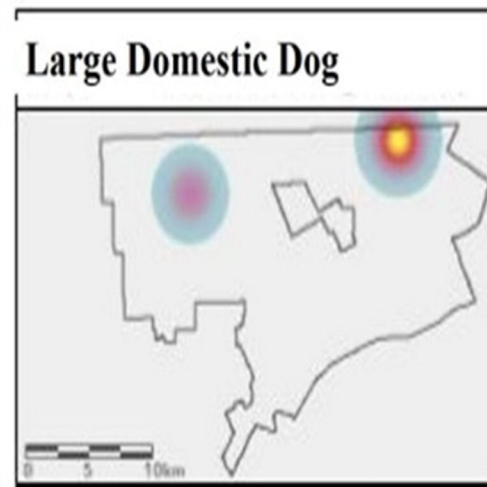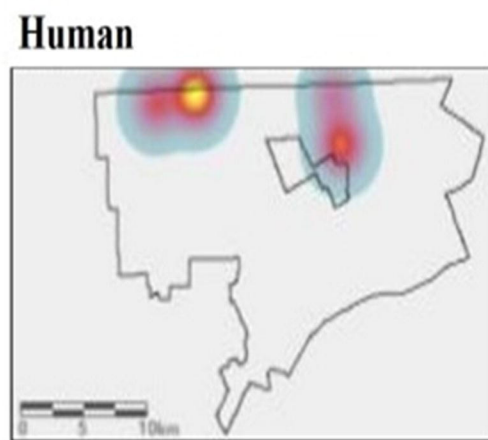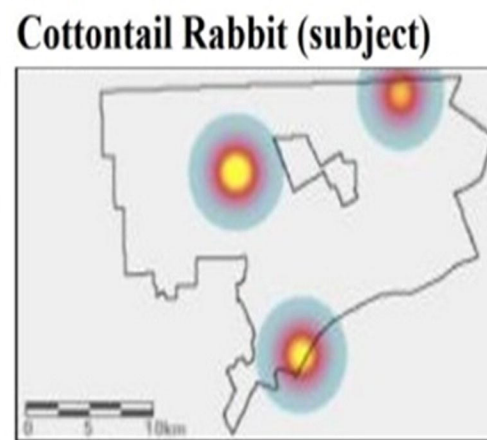

**Activity Level**

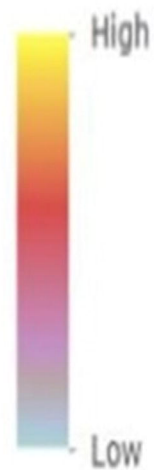

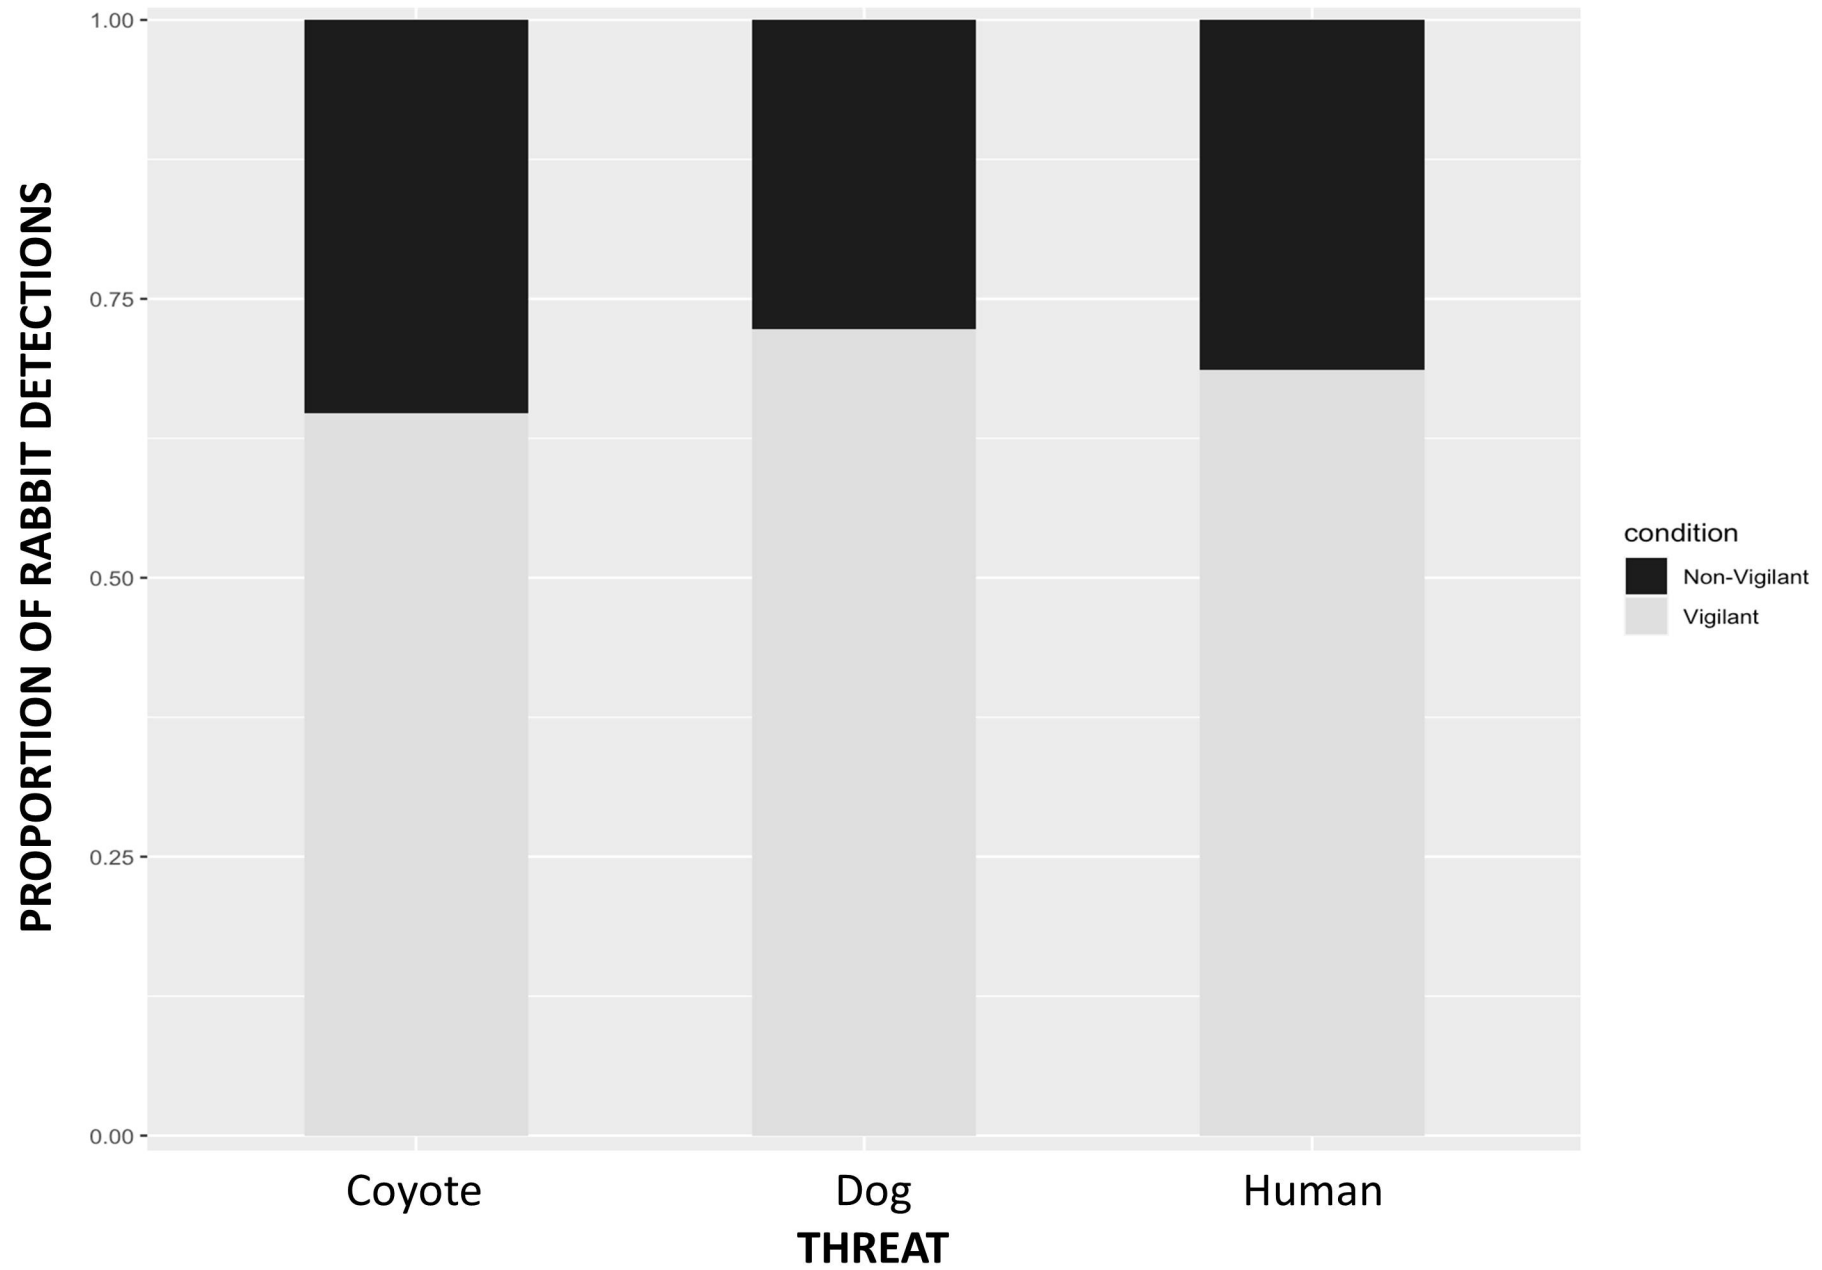

Source: https://www.biorxiv.org/content/10.1101/2020.06.09.142992v1.full.pdf
